# Supplementary material for: A flexible polyaniline/graphene/bacterial cellulose supercapacitor electrode
Source: Royal Society of Chemistry journal article supplement (doi:10.1039/c6nj03107b), 2016-12-17
Supplement: c6nj03107b1.pdf [file c6nj03107b1.pdf]

Electronic Supplementary Material (ESI) for New Journal of Chemistry.

## Supporting information

### Polyaniline/graphene/bacterial cellulose flexible electrodes for supercapacitor

Rong Liu, Lina Ma, Shu Huang, Jia Mei, Jun Xu, Guohui Yuan\*

*School of Chemistry and Chemical Engineering, Harbin Institute of Technology, Harbin, 150001, P. R.*

*China*

\*Corresponding author.

*E-mail address:* yghhit@163.com (Guohui Yuan).

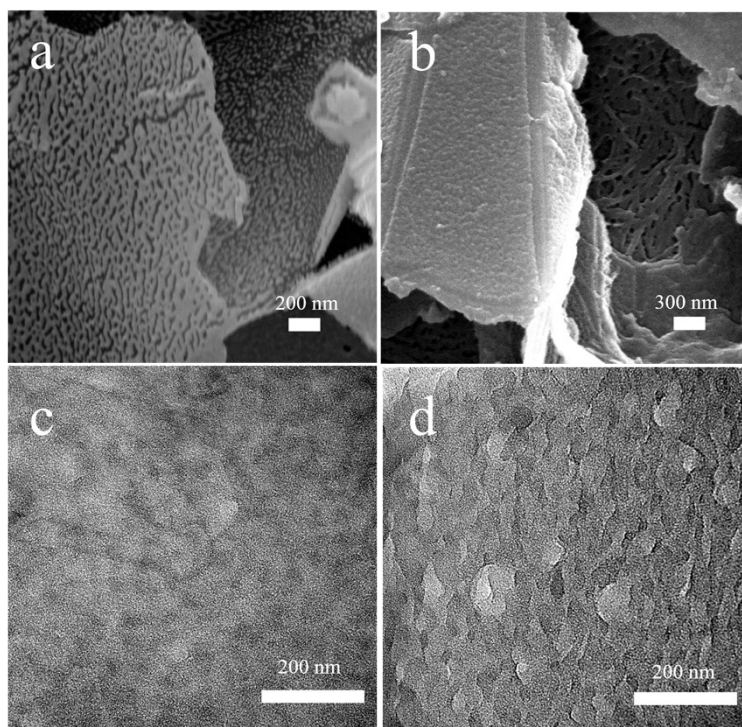

**Fig. S1** (a,b) SEM images of (a) PANL<sub>L</sub>/GN and (b) PANL<sub>M</sub>/GN. (c,d) TEM images of (c) PANL<sub>L</sub>/GN and (d) PANL<sub>M</sub>/GN.

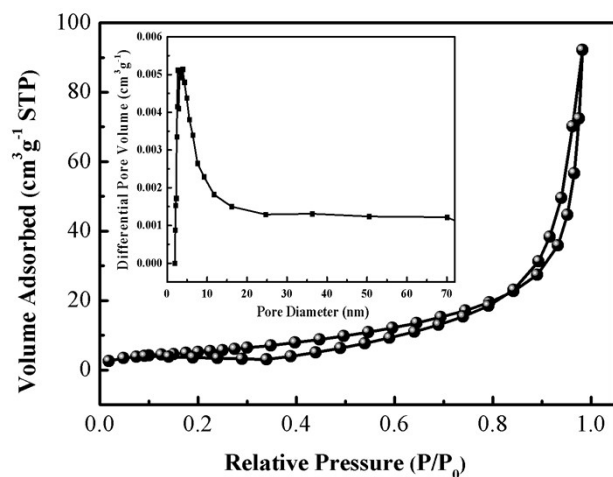

Fig. S2 Nitrogen adsorption-desorption isotherm and Pore size distribution (inset) of PANI-H/GN.

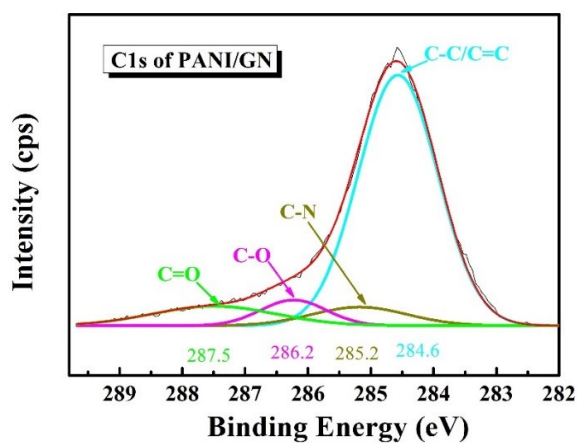

Fig. S3 High-resolution XPS spectra of the deconvoluted C1s spectra of PANI-H/GN.

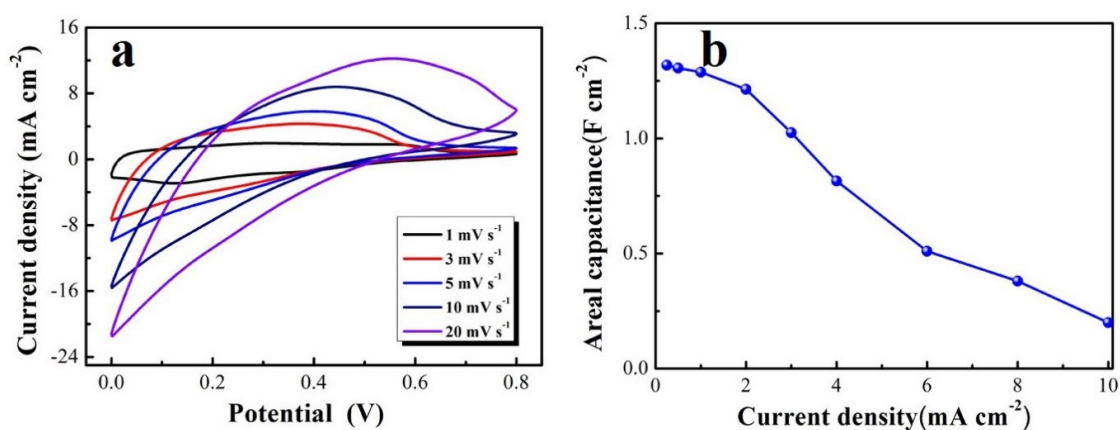

Fig. S4 (a) CV curves of PANI-H/GN/BC symmetric supercapacitor measured at different scan rates.

(b) Areal capacitance at different current densities.

**Table S1.** Literature on flexible electrodes and flexible supercapacitors

| Flexible materials                 | Mass /mg cm <sup>-2</sup> | Capacitance /mF cm <sup>-2</sup>       | Capacitance /F g <sup>-1</sup> | Cycle performance       | Ref.             |
|------------------------------------|---------------------------|----------------------------------------|--------------------------------|-------------------------|------------------|
| PANI/Carbon cloth electrode        |                           | 787.4 (approach 0 mV s <sup>-1</sup> ) | 189.73                         | 95 % after 10000 cycle  | 1                |
| PANI/Au/Paper electrode            | 2                         | 800 (1 mA cm <sup>-2</sup> )           |                                |                         | 2                |
| CNT/PANI hydrogel electrode        |                           | 680 (1 mA cm <sup>-2</sup> )           |                                |                         | 3                |
| CNT/PANI hydrogel supercapacitor   |                           | 184.6 (1 mA cm <sup>-2</sup> )         |                                |                         | 3                |
| SWCNT/Cellulose/PANI electrode     |                           | 330 (0.2 mAcm <sup>-2</sup> )          | 533                            | 79 % after 1000 cycle   | 4                |
| PANI/PVA hydrogel electrode        | 4                         | 2320 (1 A g <sup>-1</sup> )            |                                | 86 % after 1000 cycle   | 5                |
| PANI/RGO/Graphite sheet electrode  |                           | 1360                                   | 491                            | 86 % after 3000 cycle   | 6                |
| RGO/PANI supercapacitor            |                           | 23                                     |                                | 100% after 3000 cycle   | 7                |
| PANI/Graphite nanosheets electrode | 1                         | 355.6 (0.5 mA cm <sup>-2</sup> )       | 355.6                          |                         | 8                |
| PANI/Graphite supercapacitor       | 2                         | 77.8 (0.1 mA cm <sup>-2</sup> )        |                                | 83 % after 10000 cycle  | 8                |
| PANI/RGO/Cellulose supercapacitor  |                           | 5.86 (0.0043 mA cm <sup>-2</sup> )     |                                | 78.3% after 1000 cycle  | 9                |
| PANI/Co-MOF/carbon cloth electrode | 4                         | 2146 (10 mV s <sup>-1</sup> )          | 371                            | 80% after 2000 cycle    | 10               |
| PANI/RGO film                      |                           | 718                                    | 431                            | 74 % after 500 cycle    | 11               |
| PANI/GN/BC electrode               | 12.9                      | 4160 (1 mA cm <sup>-2</sup> )          | 452.2                          | 91.5 % after 2000 cycle | <b>This work</b> |
| PANI/GN/BC supercapacitor          | 12.9                      | 1320 (0.25 mA cm <sup>-2</sup> )       |                                | 90.2 % after 2000 cycle | <b>This work</b> |

## References

- 1 T. Liu, L. Finn, M. H. Yu, H. Wang, T. Zhai, X. H. Lu, Y. Tong and Y. Li, *Nano Lett.*, 2014, **14**, 2522–2527.
- 2 L.Y. Yuan, X. Xiao, T. P. Ding, J. W. Zhong, X. H. Zhang, Y. Shen, B. Hu, Y. H. Huang, J. Zhou and Z. L. Wang, *Angew. Chem. Int. Ed.*, 2012, **124**, 5018–5022.

- 3 S. Zeng, H.Y. Chen, F. Cai, Y. R. Kang, M. H. Chen and Q. W. Li, *J. Mater. Chem. A*, 2015, **3**, 23864-23870.
- 4 D. T. Ge, L. L. Yang, L. Fan, C. F. Zhang, X. Xiao, Y. Gogotsi and S. Yang, *Nano Energy*, 2015, **11**, 568-578.
- 5 W. W. Li, F. X. Gao, X. Q. Wang, N. Zhang and M. M. Ma, *Angew. Chem.*, 2016, **128**, 9342-9347.
- 6 G. X. Xin, Y. H. Wang, X. X. Liu, J. H. Zhang, Y. F. Wang, J. J. Huang, J. B. Zang, *Electrochimica Acta*, 2015, **167**, 254–261.
- 7 X. B. Zang, X. Li, M. Zhu, X. M. Li, Z. Zhen, Y. J. He, K. L. Wang, J. Q. Wei, F. Y. Kang and H. W. Zhu, *Nanoscale*, 2015, **7**, 7318-7322.
- 8 B. Yao, L. Y. Yuan, X. Xiao, J. Zhang, Y. Y. Qi, J. Zhou, J. Zhou, B. Hu and W. Chen, *Nano Energy*, 2013, **2**, 1071–1078.
- 9 X. Wang, K. Z. Gao, Z. Q. Shao, X. Q. Peng, X. Wu and F. J. Wang, *J. Power Sources*, 2014, **249**, 148–155.
- 10 L. Wang, X. Feng, L. T. Ren, Q. H. Piao, J. Q. Zhong, Y. B. Wang, H. W. Li, Y. F. Chen and B. Wang, *J. Am. Chem. Soc.*, 2015, **137**, 4920-4923.
- 11 M. Y. Kim, C. Lee and J. Jang, *Adv. Funct. Mater.*, 2014, **24**, 2489.
